# Supplementary material for: Production of decellularized porcine lung scaffolds for use in tissue engineering
Source: Royal Society of Chemistry journal article supplement (doi:10.1039/c5ib00063g), 2015-09-21
Supplement: c5ib00063g2.pdf [file c5ib00063g2.pdf]

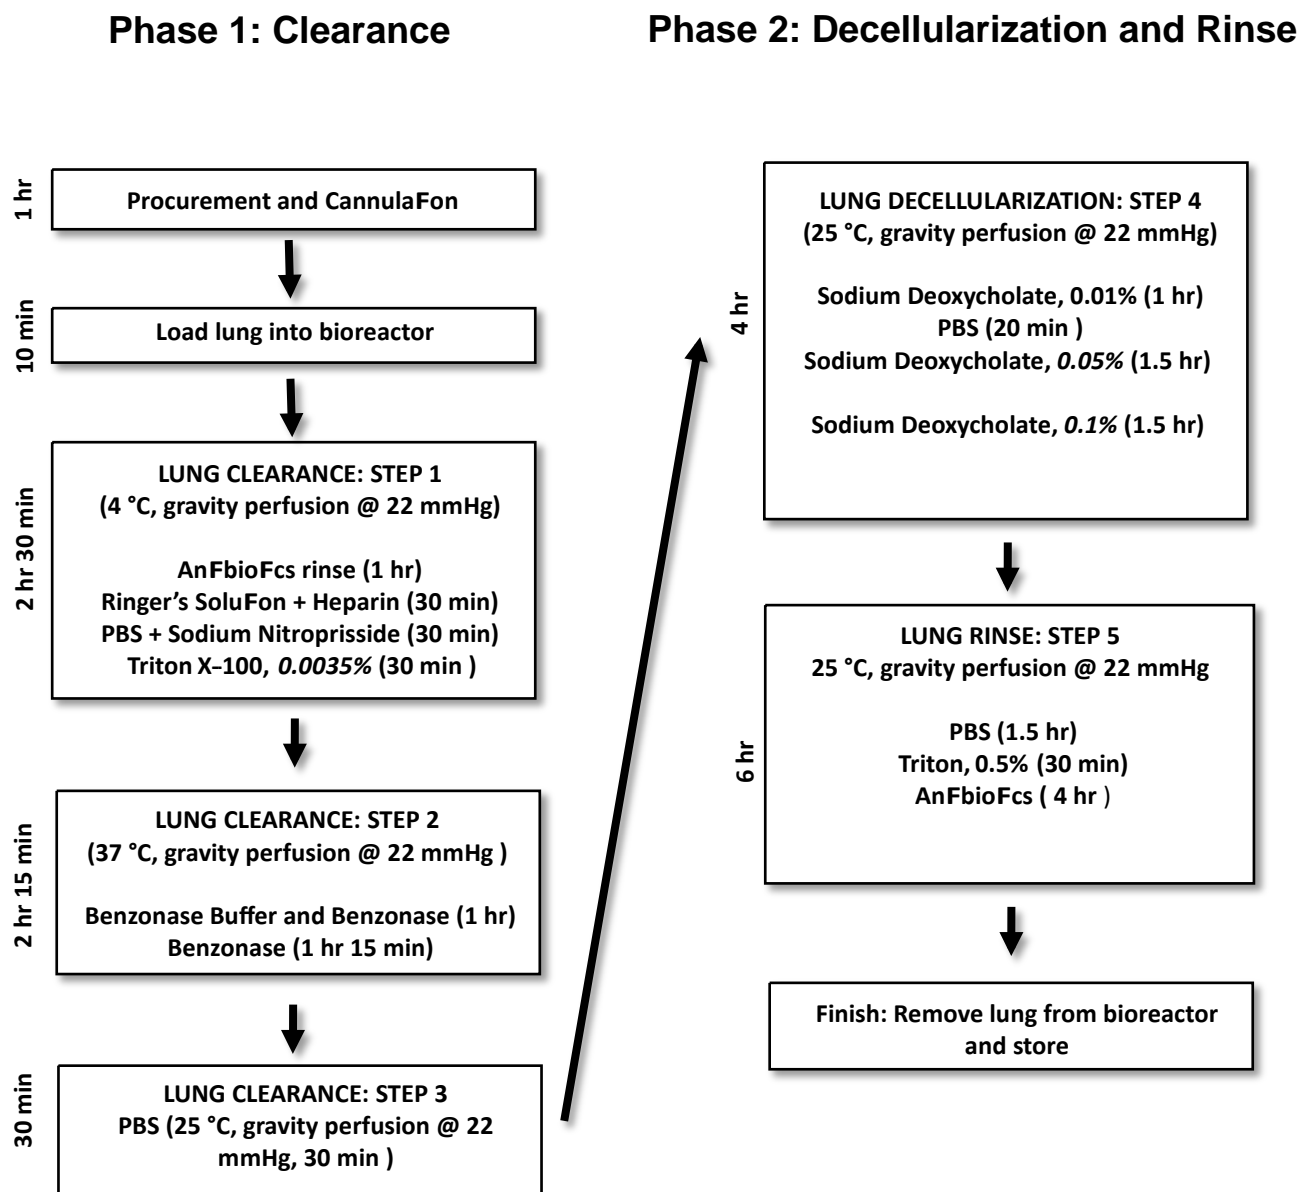

**Supplemental Figure 2** : Flow diagram of proposed decellularization procedure. Total time for the procedure is 16 hours and 35 minutes. Please refer to Table 1 for additional details.
