# Supplementary material for: Production of decellularized porcine lung scaffolds for use in tissue engineering
Source: Royal Society of Chemistry journal article supplement (doi:10.1039/c5ib00063g), 2015-09-21
Supplement: c5ib00063g3.pdf [file c5ib00063g3.pdf]

Supplemental Table 1. Bioreactor components

| <i>Name</i>                   | <i>Company</i>           | <i>Catalog Number</i> | <i>Comments</i>                         |
|-------------------------------|--------------------------|-----------------------|-----------------------------------------|
| Cylindrical glass reservoir   | N/A                      | N/A                   | Custom design at Yale University        |
| Threaded plastic gasket       | N/A                      | N/A                   | Custom design at Yale University        |
| Silicone stopper, size 14     | Cole-Parmer              | EW-06298-26           |                                         |
| Y-connectors                  | Cole-Parmer              | ED-30614-08           | Used for arterial and tracheal cannulae |
| Silicone tubing               | Masterflex (Cole Palmer) | 96420-14; 16          | L/S 14; 16                              |
| Check valve                   | Cole-Parmer              | EW-98553-20           | One-way valve                           |
| 4-way stopcocks               | Edwards Lifesciences     | 594WSC                |                                         |
| Syringe filter                | Cole-Parmer              | 2915-08               | PTFE, 0.2µm                             |
| 500 and 1000 ml glass bottles | Corning                  | 1395-500; -1L         | Used for decell and rinsing by gravity  |
