# Supplementary material for: Production of decellularized porcine lung scaffolds for use in tissue engineering
Source: Royal Society of Chemistry journal article supplement (doi:10.1039/c5ib00063g), 2015-09-21
Supplement: c5ib00063g4.pdf [file c5ib00063g4.pdf]

| <b>Decellularization Reagents</b>                                                                                                        | <b>Total time for completion</b>                                                  | <b>Model System</b>             | <b>Reference</b>         |
|------------------------------------------------------------------------------------------------------------------------------------------|-----------------------------------------------------------------------------------|---------------------------------|--------------------------|
| 0.0035% Triton X-100<br>DNase<br>0.01% sodium deoxycholate<br>0.05% sodium deoxycholate<br>0.1% sodium deoxycholate<br>0.5% Triton X-100 | 16 hours 35 minutes                                                               | Whole lung, or individual lobes | Balestrini et al. (2015) |
| 0.1% sodium dodecyl sulfate,<br>1% Triton X-100                                                                                          | Perfusion time is determined by color and translucency of lung (average ~ 3 days) | Whole lung                      | Gilpin et al. (2014)     |
| 2% sodium dodecyl sulfate<br>1% sodium dodecyl sulfate                                                                                   | 7 days                                                                            | Whole lung                      | Nichols et al. (2013)    |
| Protocol 1: 1.8 mM sodium dodecyl sulfate<br>Protocol 2: 8 mM CHAPS                                                                      | 8 hours 35 minutes                                                                | Slices                          | O'Neill et al. (2013)    |
| 3% Tween-20<br>4% sodium deoxycholate<br>0.1% peracetic acid                                                                             | 5 hours 15 minutes                                                                | Slices                          | O'Neill et al. (2013)    |
| 0.1% Triton X-100<br>2% sodium deoxycholate<br>DNase                                                                                     | 24 hours                                                                          | Whole lung                      | Price et al. (2015)      |
| 0.1% Triton-X<br>2% sodium deoxycholate<br>DNase<br>0.1% peracetic acid                                                                  | 3 days                                                                            | Lobes                           | Wagner et al. (2014)     |

Supplemental Table 2: A comparison of our protocol and previously published decellularization methods.
